# Supplementary material
Source: PubMed Central journal article supplement (PMC7519328)
Supplement: pnas.2003773117.sapp.pdf [file pnas.2003773117.sapp.pdf]

**Supplemental Information for:**

**Properties of unfolded states of proteins suggest broad selection for expanded conformational ensembles**

Micayla A. Bowman<sup>1</sup>, Joshua A. Riback<sup>2†</sup>, Anabel Rodriguez<sup>1</sup>, Hongyu Guo<sup>3</sup>, Jun Li<sup>3</sup>,  
Tobin R. Sosnick<sup>\*4,5</sup> & Patricia L. Clark<sup>\*1</sup>

<sup>1</sup>Department of Chemistry and Biochemistry, University of Notre Dame, Notre Dame, IN 46556

<sup>2</sup>Graduate Program in Biophysical Sciences, University of Chicago, Chicago, IL 60637

<sup>3</sup>Department of Applied and Computational Modeling & Statistics, University of Notre Dame,  
Notre Dame, IN 46556

<sup>4</sup>Department of Biochemistry and Molecular Biology, University of Chicago, Chicago, IL 60637

<sup>5</sup>Institute for Biophysical Dynamics, University of Chicago, Chicago, IL 60637

\*Corresponding authors:

[pclark1@nd.edu](mailto:pclark1@nd.edu)

574-631-8353

[trsosnic@uchicago.edu](mailto:trsosnic@uchicago.edu)

773-218-5950

## Supplemental Tables

**Table S1.** Raw and standardized hydropathy scales used in this work.

| Amino Acid | MJ (35)                |         | HW (11)                |         | MJHW Mean Z-score |
|------------|------------------------|---------|------------------------|---------|-------------------|
|            | Raw Score <sup>†</sup> | Z-score | Raw Score <sup>†</sup> | Z-score |                   |
| A          | 0.0200                 | -0.281  | 0.5                    | 0.152   | -0.0645           |
| C          | 0.960                  | 0.586   | 1.0                    | 0.418   | 0.502             |
| D          | -0.720                 | -0.963  | -3.0                   | -1.71   | -1.34             |
| E          | -0.740                 | -0.982  | -3.0                   | -1.71   | -1.35             |
| F          | 2.22                   | 1.75    | 2.5                    | 1.22    | 1.48              |
| G          | -0.380                 | -0.650  | 0.0                    | -0.115  | -0.382            |
| H          | 0.000                  | -0.299  | 0.5                    | 0.152   | -0.0737           |
| I          | 1.89                   | 1.44    | 1.8                    | 0.845   | 1.14              |
| K          | -1.01                  | -1.23   | -3.0                   | -1.71   | -1.47             |
| L          | 2.29                   | 1.81    | 1.8                    | 0.845   | 1.33              |
| M          | 1.36                   | 0.955   | 1.3                    | 0.578   | 0.767             |
| N          | -0.630                 | -0.880  | -0.2                   | -0.221  | -0.551            |
| P          | -0.470                 | -0.733  | 0.0                    | -0.115  | -0.424            |
| Q          | -0.560                 | -0.816  | -0.2                   | -0.221  | -0.518            |
| R          | -0.440                 | -0.705  | -3.0                   | -1.71   | -1.21             |
| S          | -0.550                 | -0.806  | -0.3                   | -0.274  | -0.540            |
| T          | -0.250                 | -0.530  | 0.4                    | 0.099   | -0.216            |
| V          | 1.34                   | 0.937   | 1.5                    | 0.685   | 0.811             |
| W          | 1.28                   | 0.881   | 3.4                    | 1.70    | 1.29              |
| Y          | 0.880                  | 0.512   | 2.3                    | 1.11    | 0.812             |

<sup>†</sup> Raw scores have been multiplied by -1, such that hydrophobic clustering creates positive peaks in hydropathy plots (**Figure 2A**).

**Table S2. Other IDPs with collapse properties measured by SAXS.**

| Protein      | Citation | $v^{\dagger}$ | HpC  | norm HpC <sup>‡</sup> | $\kappa$ | FCR <sup>§</sup> |
|--------------|----------|---------------|------|-----------------------|----------|------------------|
| PDomain      | (36)     | 0.360         | 4.45 | 0.0449                | 0.330    | 0.056            |
| NUL          | (25)     | 0.523         | 0.68 | 0.0064                | 0.094    | 0.193            |
| II-1         | (37, 38) | 0.525         | 0.00 | 0.0000                | 0.097    | 0.182            |
| N49          | (25)     | 0.537         | 0.30 | 0.0100                | 0.418    | 0.053            |
| IBB          | (25)     | 0.538         | 0.06 | 0.0007                | 0.241    | 0.320            |
| Ki-1/57      | (37, 39) | 0.539         | 0.76 | 0.0027                | 0.191    | 0.377            |
| Met2         | (40)     | 0.542         | 6.39 | 0.0306                | 0.157    | 0.216            |
| FhuA         | (3)      | 0.543         | 5.00 | 0.0368                | 0.176    | 0.177            |
| RNasA        | (3)      | 0.545         | 1.97 | 0.0170                | 0.140    | 0.140            |
| Msh6 NTR     | (41)     | 0.547         | 2.77 | 0.0091                | 0.356    | 0.335            |
| ERM (1-122)  | (37, 42) | 0.548         | 2.46 | 0.0216                | 0.220    | 0.279            |
| redAFP       | (43)     | 0.550         | 0.00 | 0.0000                | 0.278    | 0.086            |
| MeCP2        | (37, 44) | 0.550         | 5.78 | 0.0121                | 0.203    | 0.331            |
| PIR          | (37, 45) | 0.553         | 0.72 | 0.0107                | 0.353    | 0.187            |
| N98          | (25)     | 0.556         | 2.73 | 0.0191                | 0.363    | 0.020            |
| CSD1         | (37, 46) | 0.565         | 1.05 | 0.0075                | 0.179    | 0.311            |
| p53          | (37, 47) | 0.569         | 1.41 | 0.0166                | 0.202    | 0.204            |
| NUS          | (25)     | 0.578         | 0.55 | 0.0076                | N/A      | 0.000            |
| ID3 of CBP   | (48)     | 0.586         | 3.78 | 0.0095                | 0.196    | 0.108            |
| Ash1         | (15)     | 0.603         | 0.04 | 0.0005                | 0.194    | 0.181            |
| NSP          | (25)     | 0.603         | 1.69 | 0.0101                | 0.375    | 0.017            |
| NLS          | (25)     | 0.603         | 0.00 | 0.0000                | 0.391    | 0.500            |
| HMPV (P1-60) | (49)     | 0.603         | 2.92 | 0.0449                | 0.217    | 0.247            |
| HrpO         | (37, 50) | 0.603         | 2.84 | 0.0203                | 0.153    | 0.358            |

---

|      |          |       |      |        |       |       |
|------|----------|-------|------|--------|-------|-------|
| FEZ1 | (37, 51) | 0.603 | 0.55 | 0.0058 | 0.243 | 0.417 |
|------|----------|-------|------|--------|-------|-------|

---

<sup>†</sup> See (4) and (5); <sup>‡</sup>Normalized HpC; <sup>§</sup>Fraction of charged residues

## Supplemental Figures

**Figure S1. (A)** Sequence alignment of wild type PNT and sequence swap variants. **(B)** Amino acid sequences of wild type PNT, sequence swap variants and PCt. For Swaps1-4.1, swapped residues are shown in bold type. For Swap5 and Swap6, charged residues are shown in blue (acidic) and red (basic).

### (A)

```

PNT/1-334      1 DWNQSI VKTGERQHGIHIQGS DPGVVRTASGTTIKVSGRQAQGI LLENPAEELQFRNGSVTSSGQLSD 69
Swap1/1-334   1 DWNQSI VKTGERQHGIHIQGS DPGVVRTASGTTIKVSGRQAQGI LLENPAEELQFRNGSVTSSGQKSD 69
Swap2/1-334   1 DWNQSI VKTGERQHGIHIQGS DPGVVRTASGTTIKVSGRQAQGI LLENPAEELQFRNGSVTSSGQKSD 69
Swap3/1-334   1 DWNQSI VKTGERQHGIHIQGS DPGVVRTASGTTIKVSGRQAQGI LLENPAEELQFRNGSVTSSGQKST 69
Swap4/1-334   1 DWNQSI VKTGERQHGIHIQGS DPGVVRTASGTTIKVSGRQAQGI LLENPAEELQFRNGSVTSSGQLSF 69
Swap4.1/1-334 1 DWNQSI VKTGERQHGIHIQGS DPGVVRTASGTTIKVSGRQAQGI LLENPAEELQFRNGSVTSSGQLSF 69
Swap5/1-334   1 DWNQSI VKTGERQHGIHIQGS DPGVVRTASGTTIKVSGRQAQGI LLENPAEELQFRNGSVTSSGQLSD 69
Swap6/1-334   1 DWNQSI VKTGERQHGIHIQGS DPGVVRTASGTTIKVSGRQAQGI LLENPAEELQFRNGSVTSSGQLSD 69
  
```

```

PNT/1-334      70 DGI RRRFLGTVTVKAGKLVADHATLANVGD TWDDDDGIALYVAGEQAQAS IADSTLQGAGGVQIERGANVT 138
Swap1/1-334   70 DGI RRRFLGTVTVLAGKLVADHATLANVGD TWDDDDGIALYVAGEQAQAS IADSTLQGAGGVQIERGANVT 138
Swap2/1-334   70 DGI RRRCLGTVTVLAFLVADHATLANVGD TWDDDDGIALYVAGEQAQAS IADSTLQGAGGVQIERGANVT 138
Swap3/1-334   70 DGI RRRFLGDVIVKAGLLVADHATLANVGD TWDDDDGIALYVAGEQAQAS IADSTLQGAGGVQIERGANVD 138
Swap4/1-334   70 VGITRDLGRDTVKAGKLVADHATLANVGD TWDDDDGIALYVAGEQAQAS IADSTLQGAGGVQIERGADVR 138
Swap4.1/1-334 70 VGITRRLGDDTVKAGKLVADHATLANVGD TWDDDDGIALYVAGEQAQAS IADSTLQGAGGVQIERGADVE 138
Swap5/1-334   70 DGI EDFLGTVTVDAGELVADHATLANVGD TWDDDDGIALYVAGEQAQAS IADSTLQGAGGVQIEDGANVT 138
Swap6/1-334   70 RGIDRFLGTVTVEAGKLVADHATLANVGD TWDKDGIALYVAGRQAQAS IADSTLQGAGGVQIREGANVT 138
  
```

```

PNT/1-334      139 VQRSAIVDGGGLHIGALQSLQPEDLPPSRVVLRDNTNVTAVPASGAPAAVSVLGASELTLDDGGHITGGRAA 207
Swap1/1-334   139 VQRSAIVLGGGLHIGALQSLQEDPPPSRVVLRDNTNVTAVPASGAPAAVSVLGASLTLTDDGGHITGGRAA 207
Swap2/1-334   139 VQRLAIVLLGLHIGASSQSGQPEDPPPSRVVLRDNTNVTAVPASGAPAAVSVLGAMLLLLVGGHITGGRAA 207
Swap3/1-334   139 VLRLAIVDGGGLHIGALQSQPETSPPSRVVLRDNTNVTAVPASGAPAAVSVVQGASEQTLDDGAITGGRAA 207
Swap4/1-334   139 VQREAIVDGGGLHNGALQSLQPSILPPSTVVLRDNTNVTAVPASGAPAAVLVSGASGLRLDDGGHIHEGRAA 207
Swap4.1/1-334 139 VQRRAIVDGGGLHNGALQSLQPSILPPSTVVLRDNTNVTAVPASGAPAAVLVSGASGLELDDGGHIHRGRAA 207
Swap5/1-334   139 VQESAIVDGGGLHIGALQSLQPRRLPPSRVVLRKTNVTAVPASGAPAAVSVLGASKLTLRGHITGGRAA 207
Swap6/1-334   139 VQRSAIVDGGGLHIGALQSLQPERLPPSDVVLRDNTNVTAVPASGAPAAVSVLGASRLTLDDGGHITGGDA 207
  
```

```

PNT/1-334      208 GVAAMQGA VVHLQRATIRRGEALAGGAVPGGAVPGGAVPGGFPGGGFPGVLDGWYGVDVSGSSVELAQ 276
Swap1/1-334   208 GVAAMQGA VVHEQRATIRRGEALAGGAVPGGAVPGGAVPGGFPGGGFPGVLDGWYGVDVSGSSVELAQ 276
Swap2/1-334   208 GVAASQGA VDHEQRATIRRGEALAGGAVPGGAVPGGAVPGGFPGGGFPGVLDGWYGVDVSGSSVELAQ 276
Swap3/1-334   208 GVAAMLGHVVHLLQRATIRRGEALAGGAVPGGAVPGGAVPGGFPGGGFPGVLDGWYGVDVSGSSVELAQ 276
Swap4/1-334   208 GVAAMQGA VTLQTATIRRGEALAGGAVPGGAVPGGAVPGGFPGGGFPGVLDGWYGVDVSGSSVELAQ 276
Swap4.1/1-334 208 GVAAMQGA VTLQTATIRRGEALAGGAVPGGAVPGGAVPGGFPGGGFPGVLDGWYGVDVSGSSVELAQ 276
Swap5/1-334   208 GVAAMQGA VVHLQRATIRRRA LAGGAVPGGAVPGGAVPGGFPGGGFPGVLDGWYGVDVSGSSVELAQ 276
Swap6/1-334   208 GVAAMQGA VVHLQRATIERGEALAGGAVPGGAVPGGAVPGGFPGGGFPGVLDGWYGVDVSGSSVELAQ 276
  
```

```

PNT/1-334      277 IVEAPELGAAIRVGRGARVTVPGGSL SAPHGNV IETGGARRFAPQAAPLSITLQAGAH 334
Swap1/1-334   277 IVEAPELGAAIRVGRGARVTVPGGSL SAPHGNV IETGGARRFAPQAAPLSITLQAGAH 334
Swap2/1-334   277 IVEAPELGAAIRVGRGARVTVPGGSL SAPHGNV IETGGARRFAPQAAPLSITLQAGAH 334
Swap3/1-334   277 IVEAPELGAAIRVGRGARVTVPGGSL SAPHGNV IETGGARRFAPQAAPLSITLQAGAH 334
Swap4/1-334   277 IVEAPELGAAIRVGRGARVTVPGGSL SAPHGNV IETGGARRFAPQAAPLSITLQAGAH 334
Swap4.1/1-334 277 IVEAPELGAAIRVGRGARVTVPGGSL SAPHGNV IETGGARRFAPQAAPLSITLQAGAH 334
Swap5/1-334   277 IVEAPELGAAIRVGRGARVTVPGGSL SAPHGNV IETGGARRFAPQAAPLSITLQAGAH 334
Swap6/1-334   277 IVEAPELGAAIRVGRGARVTVPGGSL SAPHGNV IETGGARRFAPQAAPLSITLQAGAH 334
  
```

**(B)**

>Pnt

DWNNQSIVKTGERQHGIHIQGSDPGGVRTASGTTIKVSGRQAQGILLENPAAELQFRNGSVTSS  
GQLSDDGIRRFLGTVTVKAGKLVADHATLANVGDTWDDDGIALYVAGEQAQASIADSTLQGAGG  
VQIERGANVTVQRSAIVDGGGLHIGALQSLQPEDLPPSRVLRDNTAVPASGAPAAVSVLGAS  
ELTLDDGGHITGGRAAGVAAMQGAHVHLQRATIRRGEALAGGAVPGGAVPGGAVPGGFPGGGFGP  
VLDGWYGVDVSGSSVELAQSIIVEAPELGAAIRVGRGARVTVPGGSLSAPHGNVIETGGARRFAP  
QAAPLSITLQAGAH

>Swap1

DWNNQSIVKTGERQHGIHIQGSDPGGVRTASGTTIKVSGRQAQGILLENPAAELQFRNGSVTSS  
GQ**K**SDDGIRRFLGTVTV**L**AGKLVADHATLANVGDTWDDDGIALYVAGEQAQASIADSTLQGAGG  
VQIERGANVTVQRSAIV**L**GGLHIGALQSLQPED**D**PPSRVLRDNTAVPASGAPAAVSVLGAS  
**L**TLDDGGHITGGRAAGVAAMQGAHV**H**EQRATIRRGEALAGGAVPGGAVPGGAVPGGFPGGGFGP  
VLDGWYGVDVSGSSVELAQSIIVEAPELGAAIRVGRGARVTVPGGSLSAPHGNVIETGGARRFAP  
QAAPLSITLQAGAH

>Swap2

DWNNQSIVKTGERQHGIHIQGSDPGGVRTASGTTIKVSGRQAQGILLENPAAELQFRNGSVTSS  
GQ**K**SDDG**KRRGL**GTVTV**LAFIL**VADHATLANVGDTWDDDGIALYVAGEQAQASIADSTLQGAGG  
VQIERGANVTVQR**L**AIV**LL**GLHIGAS**SQSGQ**PED**D**PPSRVLRDNTAVPASGAPAAVSVLG**A**M  
**L**TLVGGHITGGRAAGVAASQGA**V**D**H**EQRATIRRGEALAGGAVPGGAVPGGAVPGGFPGGGFGP  
VLDGWYGVDVSGSSVELAQSIIVEAPELGAAIRVGRGARVTVPGGSLSAPHGNVIETGGARRFAP  
QAAPLSITLQAGAH

>Swap3

DWNNQSIVKTGERQHGIHIQGSDPGGVRTASGTTIKVSGRQAQGILLENPAAELQFRNGSVTSS  
GQ**K**STDG**TRRFLGD**VI**V**KAG**LL**VADHATLANVGDTWDDDGIALYVAGEQAQASIADSTLQGAGG  
VQIERGAN**V**D**VLR**LAI**V**DGGGLHIGALQ**SQ**Q**P**ETS**P**PPSRVLRDNTAVPASGAPAAVSV**Q**GAS  
E**Q**TLDDG**A**ITGGRAAGVAAM**LGH**VVHL**L**RATIRRGEALAGGAVPGGAVPGGAVPGGFPGGGFGP  
VLDGWYGVDVSGSSVELAQSIIVEAPELGAAIRVGRGARVTVPGGSLSAPHGNVIETGGARRFAP  
QAAPLSITLQAGAH

>Swap4

DWNNQSIVKTGERQHGIHIQGSDPGGVRTASGTTIKVSGRQAQGILLENPAAELQFRNGSVTSS  
GQLS**FVGI****TRDLGRD**TVKAGKLVADHATLANVGDTWDDDGIALYVAGEQAQASIADSTLQGAGG  
VQIERG**A**D**V**R**V**Q**R**E**A**IVDGGGLH**N**GALQSLQ**P**S**I**L**P**PS**T**VVLRDNTAVPASGAPAAV**L**V**S**GAS  
**GLR**LDGGH**I**H**E**GRAAGVAAMQGA**V**T**LQ**T**A**TIRRGEALAGGAVPGGAVPGGAVPGGFPGGGFGP  
VLDGWYGVDVSGSSVELAQSIIVEAPELGAAIRVGRGARVTVPGGSLSAPHGNVIETGGARRFAP  
QAAPLSITLQAGAH

>Swap4.1

DWNNQSIVKTGERQHGIHIQGSDPGGVRTASGTTIKVSGRQAQGILLENPAAELQFRNGSVTSS  
GQLS**FVGI****TRRLGDD**TVKAGKLVADHATLANVGDTWDDDGIALYVAGEQAQASIADSTLQGAGG  
VQIERG**A**D**V**E**V**Q**R**A**I**VDGGGLH**N**GALQSLQ**P**S**I**L**P**PS**T**VVLRDNTAVPASGAPAAV**L**V**S**GAS  
**GL**E**L**DDGGH**I**H**R**GRAAGVAAMQGA**V**T**LQ**T**A**TIRRGEALAGGAVPGGAVPGGAVPGGFPGGGFGP

VLDGWYGVDVSGSSVELAQSIWEAPELGAAIRVGRGARVTVPGGSLSAPHGNVIETGGARRFAP  
QAAPLSITLQAGAH

>Swap5

DWNNQSIW**KTGER**QHGIHIQGS**DPGGV**RTASGTT**IKVSGRQAQ**GIL**LEN**PAA**ELQFR**NGSVTSS  
GQL**SDDGI**EDFLGTVT**VDAGELVAD**HATLANV**GD**T**WDD**GI**ALYVAGEQAQ**ASI**AD**STLQ**GAGG**  
VQ**I**EDGANVT**VQESAIVD**GGLHIGALQSLQ**PRRLPPSRVVL**R**KT**NTAVPASGAPAAVSVLGAS  
**KLTLRGGHITGGR**AAGVAAMQ**GAVVHLQRATI**RRGRALAGGAV**PGGAVPGGAVPGGF**GP**GGFGP**  
VLDGWYGVDVSGSS**VELAQSIWEAPE**LGA**AIRVGRGARVTVPGGSLSAPHGNVIETGGARRFAP**  
QAAPLSITLQAGAH

>Swap6

DWNNQSIW**KTGER**QHGIHIQGS**DPGGV**RTASGTT**IKVSGRQAQ**GIL**LEN**PAA**ELQFR**NGSVTSS  
GQL**SDRGI**DRFLGTVT**VEAGKLVAD**HATLANV**GD**T**WDK**DI**ALYVAGRQAQ**ASI**AD**STLQ**GAGG**  
VQ**I**REGANVT**VQRS**AIV**DGGLHIGALQSLQPE**RLPP**SDVVL**R**DT**NTAVPASGAPAAVSVLGAS  
**RLTLDGGHITGDA**AGVAAMQ**GAVVHLQRATI**ER**GE**ALAGGAV**PGGAVPGGAVPGGF**GP**GGFGP**  
VLDGWYGVDVSGSS**VELAQSIWEAPE**LGA**AIRVGRGARVTVPGGSLSAPHGNVIETGGARRFAP**  
QAAPLSITLQAGAH

>Pct

AQGKALLYRVLPEPVKLTLTGGADAQGDIVATELPSIPGTSIGPLDVALASQARWTGATRAVDS  
LSIDNATWVMTDNSNVGALRLASDGSVDFQQPAEAGRFKVLTVNTLAGSGLFRMNVFADLGLSD  
KLVVMQDASGQHRLWVRNSGSEPASANTLLLVQTPLGSAATFTLANKDGKVDIGTYRYRLAANG  
NGQWSLVGAKAPP

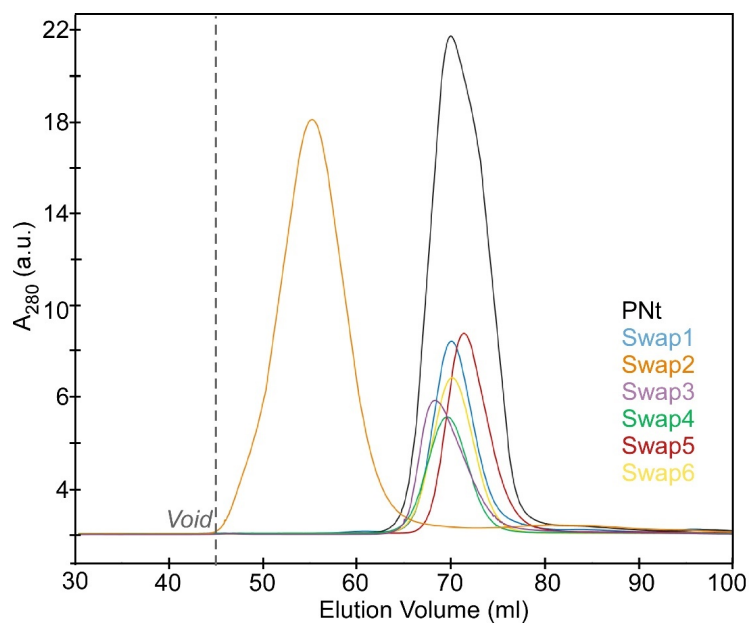

**Figure S2.** Size exclusion chromatography (SEC) of PNt and Swap variants. With the exception of Swap2, all variants elute as a monomer.



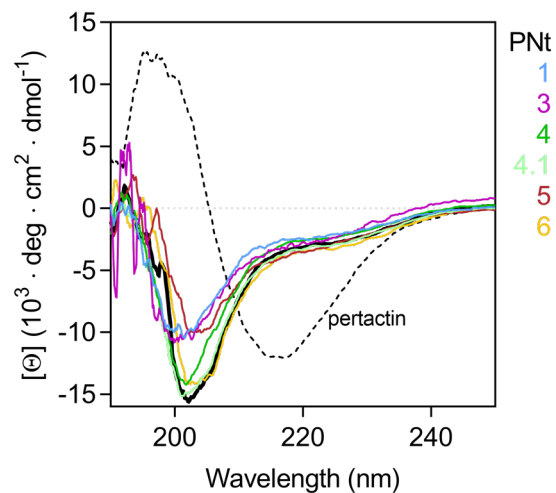

**Figure S3.** CD spectra of PNt and swap variants demonstrating random coil behavior. The spectrum of the folded  $\beta$ -helical pertactin passenger is included for comparison (dotted line).

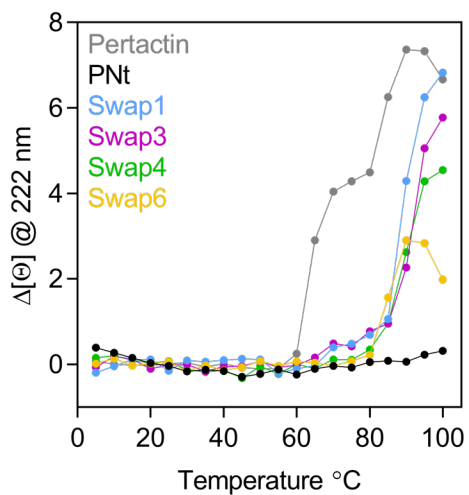

**Figure S4.** Normalized mean molar ellipticity ( $\Theta$ ) at 222 nm as a function of temperature for pertactin, PNt, or swap variants.

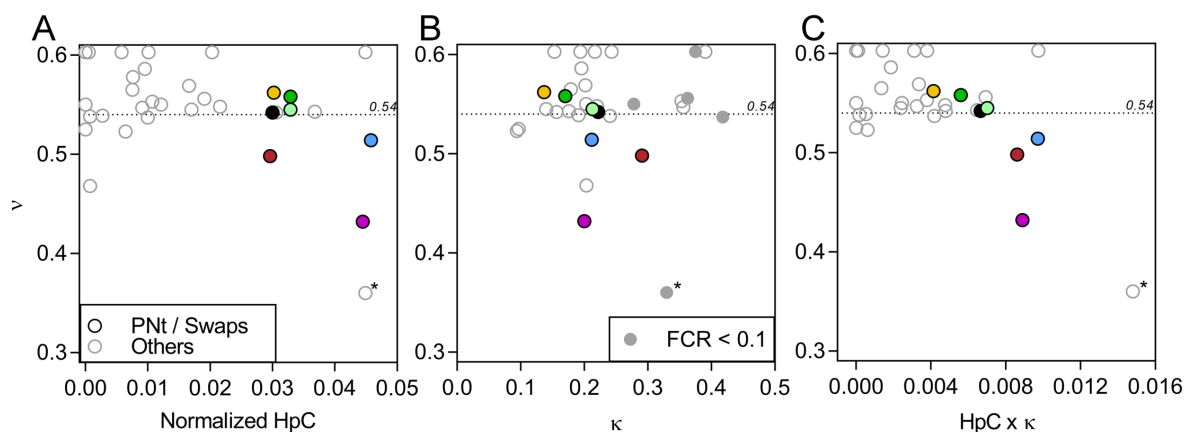

**Figure S5.** Comparison of the extent of chain collapse (quantified as the Flory exponent,  $\nu$ , for wild type PNT and swap variants (filled points; colors as described in **Figure 1**) and other IDPs (gray) as a function of **(A)** normalized HpC, **(B)**  $\kappa$ , and **(C)** Normalized HpC x  $\kappa$ . The impact of charge patterns on polypeptide behavior is expected to be minimal for polypeptide chains with few charged residues (14); for this reason, chains with a fraction of charged residues (FCR) less than 0.1 are indicated by a solid gray point in panel **B**. The dotted line at  $\nu = 0.54$  indicates the Flory exponent typical of an expanded polypeptide under native conditions (3). See **Table S2** for the list of other IDPs included here. Color scheme for swap variants as for other figures.

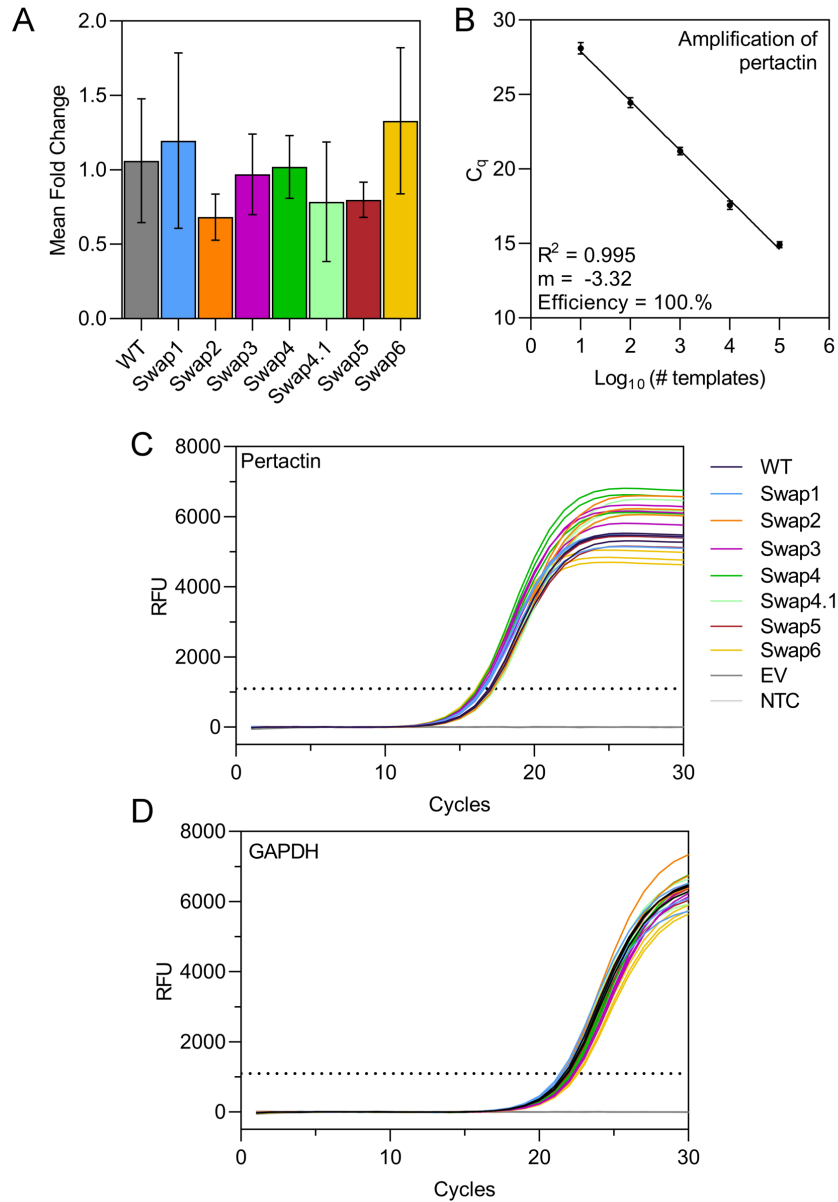

**Figure S6.** Quantification of RNA levels for full-length pertactin and swap variants chimeras. **(A)** Mean fold-change in mRNA level as measured by RT-qPCR, normalized to GAPDH, relative to wild type pertactin. Error bars represent the standard deviation from three biological replicates. **(B)** Primer amplification efficiency (100%). **(C-D)** Representative examples of raw amplification data.

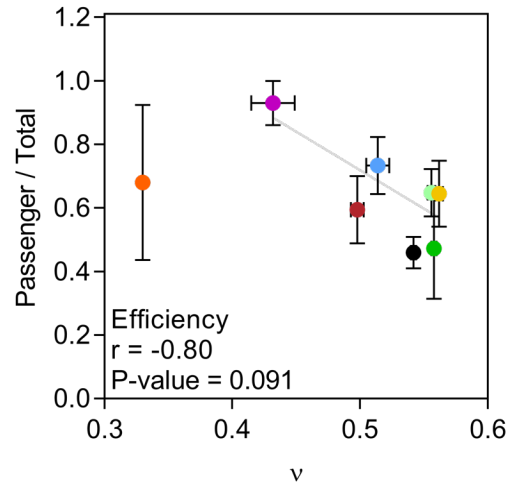

**Figure S7.** Secreted passenger fraction, calculated as the intensity of the cleaved passenger band divided by the sum of the passenger plus precursor intensities. Points for wild type PNT and swap variants are color-coded as in Figure 5 (also Figure S8, below). As explained in detail in the main text and Figure 5 legend, results for neither wild type PNT nor Swap2 were included in the correlation analysis. The correlation is not significant.

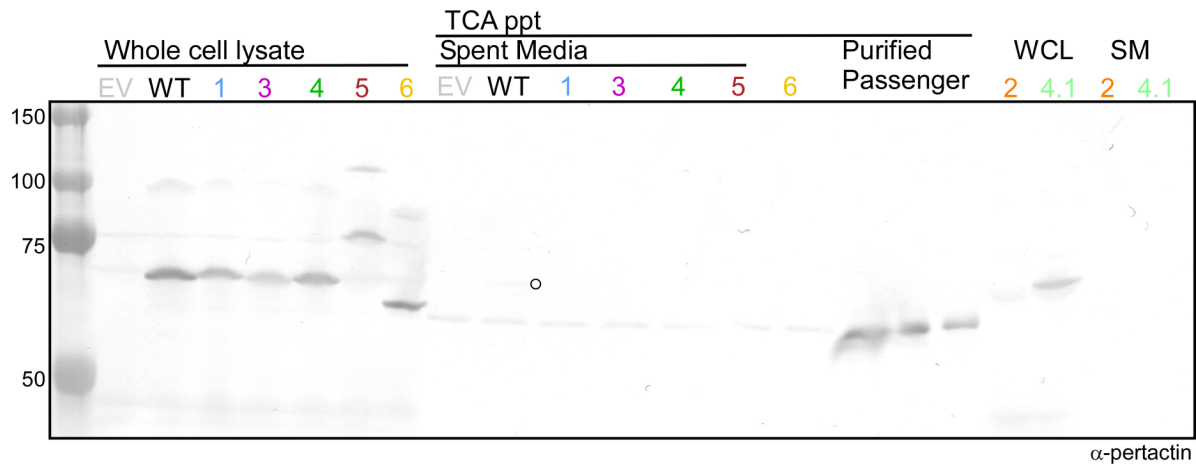

**Figure S8.**  $\alpha$ -pertactin western blot of *E. coli* whole cell lysate (WCL) or trichloroacetic acid (TCA)-precipitated spent media from cultures expressing full length pertactin (WT or with a swap-mutated PNT region; numbering and color-coding as for other figures) or an empty vector (EV) control. TCA precipitated purified passenger included as a control for reproducibility of the TCA precipitation. Note that a very small amount of passenger was detected only in the spent media of the WT sample (open circle).

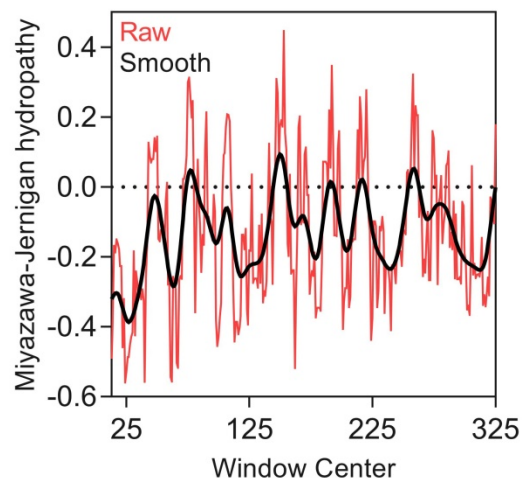

**Figure S9.** Example of averaging calculated hydropathy along sliding windows of nine amino acids (black curve) for Pnt. Per-residue hydropathy values (red) were used to calculate HpC (Methods). Gaussian smoothed curves ( $\sigma = 5$ ) were used for visual interpretation (**Figure 2A**).

## Supplemental References

36. Riback JA, *et al.* (2017) Stress-triggered phase separation is an adaptive, evolutionarily tuned response. *Cell* 168(6):1028-1040 e1019.
37. Watson MC & Curtis JE (2014) Probing the average local structure of biomolecules using small-angle scattering and scaling laws. *Biophys J* 106(11):2474-2482.
38. Boze H, *et al.* (2010) Proline-rich salivary proteins have extended conformations. *Biophys J* 99(2):656-665.
39. Bressan GC, *et al.* (2008) Human regulatory protein Ki-1/57 has characteristics of an intrinsically unstructured protein. *J Proteome Res* 7(10):4465-4474.
40. Kolonko M, *et al.* (2016) Intrinsic disorder of the C-terminal domain of *Drosophila* methoprene-tolerant protein. *PLoS ONE* 11(9):e0162950.
41. Shell SS, Putnam CD, & Kolodner RD (2007) The N terminus of *Saccharomyces cerevisiae* Msh6 is an unstructured tether to PCNA. *Mol Cell* 26(4):565-578.
42. Lens Z, *et al.* (2010) Solution structure of the N-terminal transactivation domain of ERM modified by SUMO-1. *Biochem Biophys Res Commun* 399(1):104-110.
43. LaBreck CJ, May S, Viola MG, Conti J, & Camberg JL (2017) The Protein chaperone ClpX targets native and non-native aggregated substrates for remodeling, disassembly, and degradation with ClpP. *Front Mol Biosci* 4:26.
44. Yang C, van der Woerd MJ, Muthurajan UM, Hansen JC, & Luger K (2011) Biophysical analysis and small-angle X-ray scattering-derived structures of MeCP2-nucleosome complexes. *Nucleic Acids Research* 39(10):4122-4135.
45. Moncoq K, *et al.* (2004) SAXS study of the PIR domain from the Grb14 molecular adaptor: a natively unfolded protein with a transient structure primer? *Biophys J* 87(6):4056-4064.
46. Konno T, Tanaka N, Kataoka M, Takano E, & Maki M (1997) A circular dichroism study of preferential hydration and alcohol effects on a denatured protein, pig calpastatin domain I. *Biochim Biophys Acta* 1342(1):73-82.
47. Wells M, *et al.* (2008) Structure of tumor suppressor p53 and its intrinsically disordered N-terminal transactivation domain. *Proc Natl Acad Sci USA* 105(15):5762-5767.
48. Contreras-Martos S, *et al.* (2017) Linking functions: an additional role for an intrinsically disordered linker domain in the transcriptional coactivator CBP. *Sci Rep* 7(1):4676.
49. Renner M, Paesen GC, Grison CM, & Reports G-S (2017) Structural dissection of human metapneumovirus phosphoprotein using small angle x-ray scattering. *Scientific Reports*.

50. Gazi AD, *et al.* (2008) Evidence for a coiled-coil interaction mode of disordered proteins from bacterial type III secretion systems. *J Biol Chem* 283(49):34062-34068.
51. Alborghetti MR, *et al.* (2010) Human FEZ1 protein forms a disulfide bond mediated dimer: implications for cargo transport. *J Proteome Res* 9(9):4595-4603.
